# Supplementary figures and images for: Thermal stability of Mg2Si0.3Sn0.7 under different heat treatment conditions
Source: Royal Society of Chemistry journal article supplement (doi:10.1039/c5tc01434d), 2015-01-01

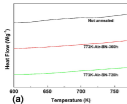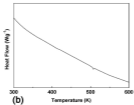

Supplement: c5tc01434d2.pdf [file c5tc01434d2.pdf]

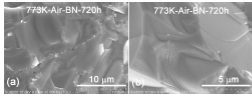

Supplement: c5tc01434d3.pdf [file c5tc01434d3.pdf]

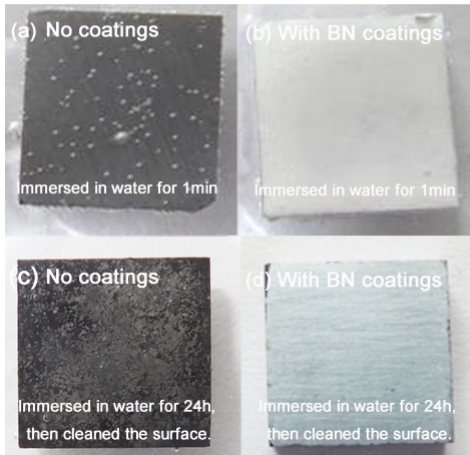

Supplement: c5tc01434d4.pdf [file c5tc01434d4.pdf]
